# Supplementary material
Source: publisher figshare collection journal article supplement (https://gsajournals.figshare.com/articles/dataset/_/13395617)

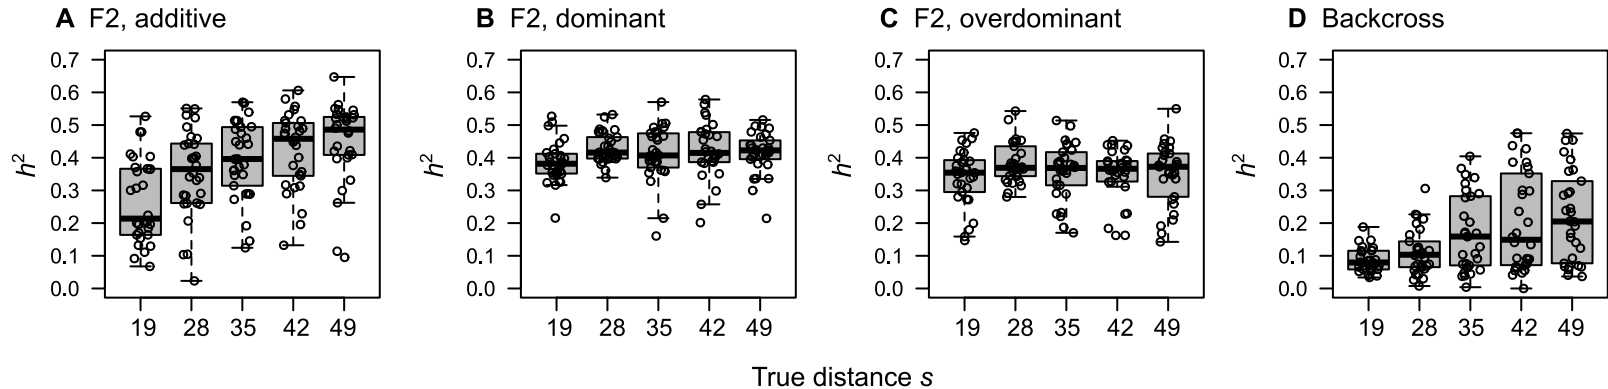

Supplement: Supplementary file 1 [file 1]

**A** Trichome

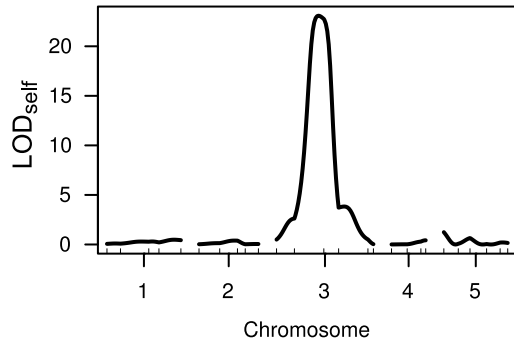

**B** No. of leaf holes

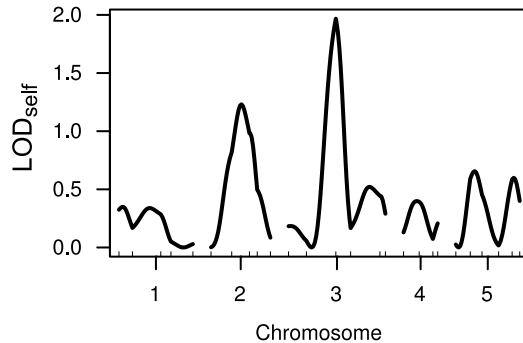

**C** Bolting

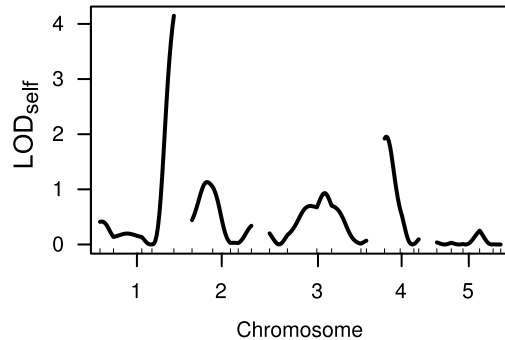

Supplement: Supplementary file 2 [file 1]

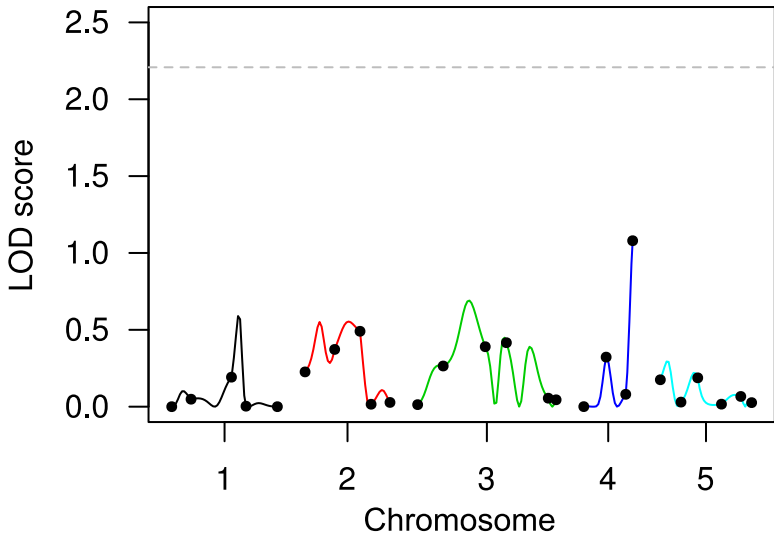

Supplement: Supplementary file 3 [file 1]
